# To $\beta$ or Not To $\beta$ : Estrogen Receptors and Ovarian Function

Much of what we know about hormone action in the vertebrate endocrine system comes from studies of estrogen and its signaling pathways, and, in turn, a good deal of this information derives from studies of the ovary. The identification of an estrogenic activity produced in the ovary dates to the studies of Allen and Doisy in 1923 (1) and eventually led to the crystallization of estrone in 1929 (2). The ability to prepare labeled [ $^3\text{H}$ ]estradiol allowed the identification of specific target tissues, solidified the receptor concept, and was crucial to the identification of the estrogen receptor, the first hormone receptor (3, 4). Even at these early stages, it was recognized not only that estrogens are made in the ovary, but that the ovary is itself a target for estrogen action (5, 6). With the identification of a second estrogen receptor, ER $\beta$ , in 1996 (7) and the finding that this form predominates over ER $\alpha$  in the ovary (8, 9), new interest emerged in the intraovarian roles of estrogen and the estrogen receptors that mediate these effects. Definitive evidence regarding the importance and relative contributions of the two estrogen receptors in the ovary began to accumulate after the targeted disruption of estrogen receptors  $\alpha$  (10),  $\beta$  (11, 12), or the combination (12, 13) in mice. The story of estrogen, its receptors, and the ovary continues to be written with the study by Couse *et al.* (14), which provides new insights into the ovarian molecular phenotypes of mice lacking each estrogen receptor, in this issue of *Endocrinology*.

In many respects, the ER $\alpha$  knockout mice ( $\alpha$ ERKO) have the most severe ovarian phenotype, in which follicles fail to mature or ovulate and form hemorrhagic cysts, leading to infertility (10, 12). However, subsequent studies revealed that much of the  $\alpha$ ERKO ovarian phenotype could be explained by the lack of estrogen-mediated negative feedback on pituitary LH secretion, resulting in chronically elevated LH levels and enhanced ovarian steroidogenesis (15, 16). Indeed, chronic treatment with a GnRH antagonist to suppress LH reverses the cystic ovarian phenotype, and immature  $\alpha$ ERKO mice can be successfully ovulated with exogenous gonadotropins before the onset of overt LH hypersecretion (17), although in the ER $\alpha$  knockout model generated by Dupont *et al.* (12) no ovulations in response to exogenous gonadotropins were observed. In contrast to the  $\alpha$ ERKO phenotype, gonadotropins and steroids are largely normal in  $\beta$ ERKO mice (16), implicating ER $\alpha$  as mediating most of the negative feedback effects of estrogens on pituitary gonadotropin secretion.

The  $\beta$ ERKO mouse ovaries appear grossly normal, with

Abbreviations: ER, Estrogen receptor; ERKO, ER knockout; hCG, human chorionic gonadotropin; PMSG, pregnant mare serum gonadotropin.

*Endocrinology* is published monthly by The Endocrine Society (<http://www.endo-society.org>), the foremost professional society serving the endocrine community.

follicles at all stages of development but fewer corpora lutea. In agreement with this finding, these female mice exhibit reduced fertility, although there appears to be a range that extends from mild subfertility to complete infertility (11, 12). The  $\beta$ ERKO mice also fail to respond to exogenous gonadotropins and exhibit mature follicles containing “trapped” oocytes, suggesting a deficiency in the response to the LH/human chorionic gonadotropin (hCG) ovulatory stimulus. Not surprisingly, the combined  $\alpha\beta$ ERKO mice are also infertile and have the attenuated folliculogenesis and anovulatory phenotype characteristic of the  $\alpha$ ERKO mice (12, 13). However, an unexpected finding was the apparent transdifferentiation of granulosa cells toward a male Sertoli cell phenotype in the  $\alpha\beta$ ERKO mice, a phenotype that is also seen in mice with a targeted disruption of the *cyp19* gene encoding aromatase, the critical enzyme in estrogen biosynthesis, generating a complete estrogen-deficient state (18–20).

All of this work is suggestive of a primary role for ER $\beta$  in regulating follicle development and ovulation but does not provide for a complete mechanistic understanding of the roles or targets of ER $\beta$  in the ovary. The studies by Couse *et al.* (14) in this issue of *Endocrinology* begin to address these issues with a detailed analysis of the molecular phenotypes of the  $\alpha$ ERKO and  $\beta$ ERKO mice in the pre- and periovulatory period. The overall picture that emerges is that the predominant ER $\beta$ -expressing cells of the ovary, the granulosa cells, exhibit an attenuated response to FSH (or pregnant mare serum gonadotropin, PMSG) in the  $\beta$ ERKO ovary and, as a consequence, are not able to respond appropriately to the LH (hCG) stimulus to initiate cumulus expansion, follicle rupture, and ovulation. Supporting these conclusions regarding aberrant PMSG-induced granulosa cell differentiation are the findings that two classical markers of granulosa cell differentiation, the LH receptor and aromatase, show attenuated or delayed expression in the  $\beta$ ERKO ovary. Although overall ovarian LH receptor mRNA levels are more or less normal, there is a selective failure of PMSG-induced LH receptor expression in the granulosa cells, and aromatase induction is delayed and does not occur until after the hCG stimulus, resulting in reduced estradiol secretion in the preovulatory period. Thus, the follicle is delayed in its maturation and is not poised to respond to the ovulatory stimulus. As a consequence, several key genes known to be critical for ovulation, including prostaglandin synthase 2 (21) and the progesterone receptor (22), fail to be appropriately induced by LH-hCG in the  $\beta$ ERKO mouse ovaries. Morphological examination of the  $\beta$ ERKO ovaries points to a failure of LH to induce expansion of the cumulus-oocyte complex in a subset of the preovulatory follicles, consistent with attenuated LH action and a periovulatory defect in the follicle. It is curious that only some follicles exhibit the reduced cumulus-oocyte complex expansion, and it seems reasonable to spec-

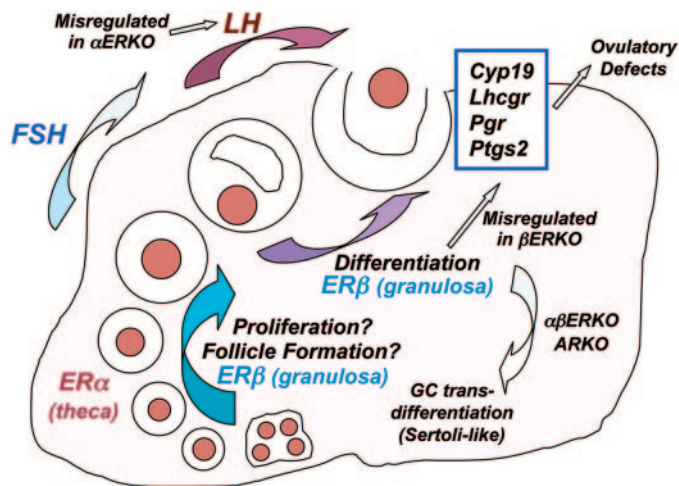

FIG. 1. Model for estrogen and estrogen receptor actions in the ovary. A pathway of follicle formation and maturation is shown, with later stages of follicular development regulated by FSH and ovulation and luteinization triggered by LH. ER $\alpha$  is expressed in thecal/interstitial cells but appears to have few discernible intraovarian effects; rather, LH hypersecretion in the  $\alpha$ ERKO mouse is responsible for most of the observed ovarian phenotypes. ER $\beta$  is expressed in the granulosa cell, and emerging evidence implicates it and estrogens in the formation or activation of early follicles. The study by Couse *et al.* (14) in this issue demonstrates a requirement for ER $\beta$  in FSH-induced differentiation of the granulosa cells of antral follicles. In the absence of this key signal, a variety of genes critical to follicular maturation and ovulation are misregulated (indicated in the box), leading to impaired fertility of  $\beta$ ERKO mice.

ulate that those that appear morphologically normal are capable of subsequent ovulation, consistent with the wide variability in ovulation rate by the  $\beta$ ERKO female mice observed in this study.

Recent related work from the Korach laboratory (23) that investigated the growth and maturation of follicles from the  $\alpha$ ERKO and  $\beta$ ERKO ovaries *in vitro* further supports the concept that ER $\beta$  plays a predominant role in follicular maturation. These data demonstrate that preantral follicles from  $\beta$ ERKO mice maintained in culture exhibit slower growth, decreased estradiol secretion, and reduced ovulatory capacity compared with follicles from wild-type or  $\alpha$ ERKO mice. Importantly, follicles cultured from  $\alpha$ ERKO mice, removed from the environment of elevated LH and androgen that exists in the  $\alpha$ ERKO mouse, behave normally with respect to the parameters tested, consistent with the view that ER $\alpha$  does not have a significant role in mediating the intraovarian responses to estrogens. Furthermore, this paper reports detailed *in vivo* follicle counts from  $\beta$ ERKO mice, confirming that the pool of larger antral follicles is reduced, an observation also made by Dupont *et al.* (12). These effects on later-stage follicles would appear to impact survival or differentiation of the follicle, as proliferation of the granulosa cells appears to be relatively normal.

Interestingly, the adult  $\beta$ ERKO ovary had a significantly increased pool of primordial follicles with correspondingly fewer primary follicles (23), hinting at an effect of ER $\beta$  on much earlier stages of follicle formation than heretofore appreciated. Two related observations are consistent with a role for estrogens and ER $\beta$  in early folliculogenesis. First, ar-

matase (and thus estrogen)-deficient (ArKO) mice have reduced numbers of primordial and primary follicles at 10 wk of age compared with wild type (24). This phenotype was not impacted by estradiol replacement from wk 7–10, arguing that the impact of estrogen deficiency may be manifest at the time of early follicle formation from the germ cell syncytium or may represent earlier or enhanced activation of the ordinarily static primordial follicle pool. Second, studies to treat hypophysectomized rats or GnRH antagonist-treated mice with ER $\alpha$  or ER $\beta$  selective agonists (25) demonstrate that the ER $\beta$  agonist 8-vinylestra-1,3,5(10)-triene-3,17 $\beta$ -diol caused a robust increase in the numbers of primary stage 3a/3b follicles as well as later-stage preantral and antral follicles compared with the vehicle control, an effect not seen with the ER $\alpha$  selective agonist. Together, these observations suggest an estrogen effect mediated by ER $\beta$  on the earliest stages of follicle formation and fate.

The new studies by Couse *et al.* (14) reported in this issue, together with other recent work in related models, go a long way toward demonstrating that it is indeed ER $\beta$  that mediates the critical actions of estrogens in the ovary and that, in the absence of this signaling pathway, FSH-stimulated granulosa cell differentiation is attenuated, resulting in a follicle that cannot fully respond to the LH ovulatory stimulus (Fig. 1). Although changes in several key receptors and enzyme activities have been identified, there is still likely much to be learned about interactions between FSH and estrogen signaling and about the proximal targets for ER $\beta$  regulation in the granulosa cell. Also new on the horizon are the ligand-independent activities of the estrogen receptors and the non-classical roles such receptors might play in ovarian function (26). Equally exciting is the growing body of evidence suggesting early actions of estrogens in follicle formation, maturation or atresia, and, indeed, in regulating the sexual differentiation of ovarian granulosa cells. The evidence thus far suggests that these actions are also likely to be mediated by ER $\beta$ . In much the same way as ER $\beta$  appears to enhance FSH signaling in regulating later stages of follicle maturation (14), it seems likely that ER $\beta$  will have a modifying influence on signaling pathways for hormones such as activin or other TGF $\beta$  family proteins in regulating earlier stages of folliculogenesis (27). We know surprisingly little about the regulatory events controlling follicle formation, activation, and maturation before the onset of gonadotropin dependence, and it looks as though this is yet another research area in which estrogens might help lead the way.

Teresa K. Woodruff and Kelly E. Mayo  
Departments of Neurobiology and Physiology (T.K.W.)  
and Biochemistry, Molecular Biology, and Cell Biology  
(K.E.M.), and Center for Reproductive Science (T.K.W.,  
K.E.M.), Northwestern University, Evanston, Illinois  
60208

### Acknowledgments

Received May 25, 2005. Accepted May 31, 2005.

Address all correspondence and requests for reprints to: Dr. Kelly E. Mayo, Department of Biochemistry, Molecular Biology, and Cell Biology, Northwestern University, 2205 Tech Drive, Hogan Hall 4–112, Evanston, Illinois 60208. E-mail: k-mayo@northwestern.edu.

## References

- Allen E, Doisy EA 1923 An ovarian hormone. Preliminary report on its localization, extraction and partial purification, and action in test animals. *JAMA* 81:819–821
- Goldzieher JW 1993 The history of steroidal contraceptive development: the estrogens. *Perspect Biol Med* 36:363–368
- Jensen EV, Jacobson HI 1962 Basic guides to the mechanism of estrogen action. *Recent Prog Horm Res* 18:387–414
- Gorski J, Toft D, Shyamala G, Smith D, Notides A 1968 Hormone receptors: studies on the interaction of estrogen with the uterus. *Recent Prog Horm Res* 24:45–80
- Pencharz RI 1940 Effects of estrogens and androgens alone and in combination with chorionic gonadotropin on the ovary of the hypophysectomized rats. *Science* 91:554–555
- Williams PC 1940 Effects of stilbestrol on the ovaries of hypophysectomized rats. *Nature* 145:388–389
- Kuiper GG, Enmark E, Peltö-Huikko M, Nilsson S, Gustafsson JA 1996 Cloning of a novel receptor expressed in rat prostate and ovary. *Proc Natl Acad Sci USA* 93:5926–5930
- Byers M, Kuiper GG, Gustafsson JA, Park-Sarge OK 1997 Estrogen receptor-beta mRNA expression in rat ovary: down-regulation by gonadotropins. *Mol Endocrinol* 11:172–182
- Saunders PT, Maguire SM, Gaughan J, Millar MR 1997 Expression of oestrogen receptor beta (ER $\beta$ ) in multiple rat tissues visualised by immunohistochemistry. *J Endocrinol* 154:R13–R16
- Lubahn DB, Moyer JS, Golding TS, Couse JF, Korach KS, Smithies O 1993 Alteration of reproductive function but not prenatal sexual development after insertional disruption of the mouse estrogen receptor gene. *Proc Natl Acad Sci USA* 90:11162–11166
- Krege JH, Hodgin JB, Couse JF, Enmark E, Warner M, Mahler JF, Sar M, Korach KS, Gustafsson JA, Smithies O 1998 Generation and reproductive phenotypes of mice lacking estrogen receptor  $\beta$ . *Proc Natl Acad Sci USA* 95:15677–15682
- Dupont S, Krust A, Gansmuller A, Dierich A, Chambon P, Mark M 2000 Effect of single and compound knockouts of estrogen receptors  $\alpha$  (ER $\alpha$ ) and  $\beta$  (ER $\beta$ ) on mouse reproductive phenotypes. *Development* 127:4277–4291
- Couse JF, Hewitt SC, Bunch DO, Sar M, Walker VR, Davis BJ, Korach KS 1999 Postnatal sex reversal of the ovaries in mice lacking estrogen receptors  $\alpha$  and  $\beta$ . *Science* 286:2328–2331
- Couse JF, Yates MM, Deroo BJ, Korach KS 2005 Estrogen receptor- $\beta$  augments gonadotropin-induced granulosa cell differentiation and the preovulatory response to gonadotropins. *Endocrinology* 146:3247–3262
- Schomberg DW, Couse JF, Mukherjee A, Lubahn DB, Sar M, Mayo KE, Korach KS 1999 Targeted disruption of the estrogen receptor- $\alpha$  gene in female mice: characterization of ovarian responses and phenotype in the adult. *Endocrinology* 140:2733–2744
- Couse JF, Yates MM, Walker VR, Korach KS 2003 Characterization of the hypothalamic-pituitary-gonadal axis in estrogen receptor (ER) null mice reveals hypergonadism and endocrine sex reversal in females lacking ER $\alpha$  but not ER $\beta$ . *Mol Endocrinol* 17:1039–1053
- Couse JF, Bunch DO, Lindzey J, Schomberg DW, Korach KS 1999 Prevention of the polycystic ovarian phenotype and characterization of ovulatory capacity in the estrogen receptor- $\alpha$  knockout mouse. *Endocrinology* 140:5855–5865
- Fisher CR, Graves KH, Parlow AF, Simpson ER 1998 Characterization of mice deficient in aromatase (ArKO) because of targeted disruption of the cyp19 gene. *Proc Natl Acad Sci USA* 95:6965–6970
- Toda K, Takeda K, Okada T, Akira S, Saibara T, Kaname T, Yamamura K, Onishi S, Shizuta Y 2001 Targeted disruption of the aromatase P450 gene (Cyp19) in mice and their ovarian and uterine responses to 17 $\beta$ -oestradiol. *J Endocrinol* 170:99–111
- Britt KL, Kerr J, O'Donnell L, Jones ME, Drummond AE, Davis SR, Simpson ER, Findlay JK 2002 Estrogen regulates development of the somatic cell phenotype in the eutherian ovary. *FASEB J* 11:1389–1397
- Lim H, Paria BC, Das SK, Dinchuk JE, Langenbach R, Trzaskos JM, Dey SK 1997 Multiple female reproductive failures in cyclooxygenase 2-deficient mice. *Cell* 91:197–208
- Lydon JP, DeMayo FJ, Funk CR, Mani SK, Hughes AR, Montgomery Jr CA, Shyamala G, Conneely OM, O'Malley BW 1995 Mice lacking progesterone receptor exhibit pleiotropic reproductive abnormalities. *Genes Dev* 9:2266–2278
- Emmen JM, Couse JF, Elmore SA, Yates MM, Kissling GE, Korach KS 2005 In vitro growth and ovulation of follicles from ovaries of estrogen receptor (ER) $\alpha$  and ER $\beta$  null mice indicate a role for ER $\beta$  in follicular maturation. *Endocrinology* 146:2817–2826
- Britt KL, Saunders PK, McPherson SJ, Misso ML, Simpson ER, Findlay JK 2004 Estrogen actions on follicle formation and early follicle development. *Biol Reprod* 71:1712–1723
- Hegele-Hartung C, Siebel P, Peters O, Kosemund D, Muller G, Hillisch A, Walter A, Kraetzschmar J, Fritzemeier KH 2004 Impact of isotype-selective estrogen receptor agonists on ovarian function. *Proc Natl Acad Sci USA* 101:5129–5134
- Jakacka M, Ito M, Martinson F, Ishikawa T, Lee EJ, Jameson JL 2002 An estrogen receptor (ER) $\alpha$  deoxyribonucleic acid-binding domain knock-in mutation provides evidence for nonclassical ER pathway signaling *in vivo*. *Mol Endocrinol* 16:2188–2201
- Findlay JK, Drummond AE, Dyson ML, Baillie AJ, Robertson DM, Ethier JF 2002 Recruitment and development of the follicle; the roles of the transforming growth factor-beta superfamily. *Mol Cell Endocrinol* 191:35–43

*Endocrinology* is published monthly by The Endocrine Society (<http://www.endo-society.org>), the foremost professional society serving the endocrine community.
